# Supplementary material for: Integrated Risks from Air Pollution and Climate Extremes: Synergistic Effects of Ozone, Heat, and Humidity on Cardiovascular Mortality
Source: Research Square preprint supplement (doi:10.21203/rs.3.rs-7167234/v1), 2025-07-26
Supplement: Supplementary file 1 [file f5c24da091af705f31336449.docx]

**Supplementary material information**

**Contents**

Figure S1. Exposure-response relationship between ozone concentration and cardiovascular mortality in Zhejiang province in summer.**1**

**Table S1. Definitions of Different Temperature and Humidity Levels1**


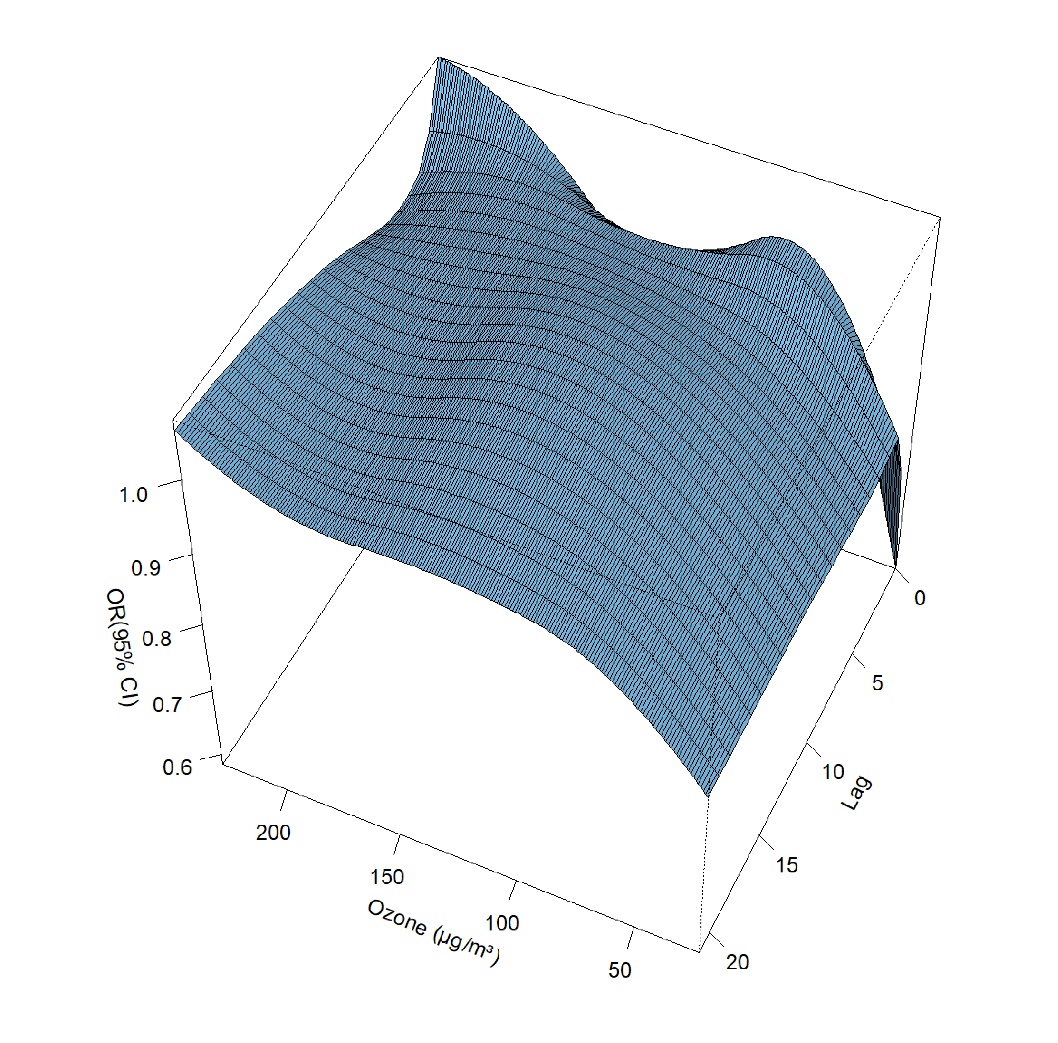


Figure S1. Exposure-response relationship between ozone concentration and cardiovascular mortality in Zhejiang province in summer. Three-dimensional surface plot of ozone concentration and lag days association with mortality risk

Table S1. Definitions of Different Temperature and Humidity Levels

| Variable | Definition | abbreviation |
| --- | --- | --- |
| High Temperature | T > *P*95 | HT |
| Low Temperature | T < *P*5 | LT |
| Mean Temperature | *P*5 ≤ T ≤ *P*95 | MT |
| High Humidity | RH ≥ 70% | HH |
| Mean Humidity | 40% ≤ RH < 70% | MH |
| Low Humidity | RH ≤ 40% | LH |
